# Supplementary material for: When Correction Turns Positive: Processing Corrective Prosody in Dutch
Source: PLoS One. 2015 May 14;10(5):e0126299. doi: 10.1371/journal.pone.0126299 (PMC4431819; doi:10.1371/journal.pone.0126299)
Supplement: S1 Table — The table contains the experimental materials used in both experiments. In experiment 1 we used only the answer sentence in the two accent conditions (corrective accent vs. new information accent). In experiment 2 we used both the question and the corresponding answer. (XLSX) [file pone.0126299.s001.xlsx]

## Sheet: Sheet1
	"When correction turns positive": STIMULUS MATERIALS
ITEM	CONTEXT		ANSWER
	WH-QUESTION (non-corrective)	YES-NO QUESTION (corrective)	Corrective accent on proper name: L*H	Non-corrective accent on proper name: H*L
1	Wie heeft de laatste strafschop genomen?	Wist jij dat Robbie de laatste strafschop heeft genomen?	Volgens mij heeft Thomas de strafschop genomen.	Volgens mij heeft Thomas de strafschop genomen.
2	Wie heeft zonet het raam opengedaan?	Wist jij dat Anneke zonet het raam heeft opgedaan?	Volgens mij heeft Roos het raam opengedaan.	Volgens mij heeft Roos het raam opengedaan.
3	Wie heeft gisteren de vuilniszak weggebracht?	Wist jij dat André gisteren de vuilniszak heeft weggebracht?	Volgens mij heeft Lucas de vuilniszak weggebracht.	Volgens mij heeft Lucas de vuilniszak weggebracht.
4	Wie heeft vorige week de concertkaartjes opgehaald?	Wist jij dat Liesbeth de concertkaartjes heeft opgehaald?	Volgens mij heeft Sara de kaartjes opgehaald.	Volgens mij heeft Sara de kaartjes opgehaald.
5	Wie heeft dit seizoen de hockeyclub verlaten?	Wist jij dat Chris dit seizoen de hockeyclub heeft verlaten?	Volgens mij heeft Ruben de hockeyclub verlaten.	Volgens mij heeft Ruben de hockeyclub verlaten.
6	Wie heeft de inkopen voor de barbecue gedaan?	Wist jij dat Jeanine de inkopen voor de barbecue heeft gedaan?	Volgens mij heeft Floor de inkopen gedaan.	Volgens mij heeft Floor de inkopen gedaan.
7	Welke instructeur heeft de aerobics-les gegeven?	Wist jij dat John de aerobics-les heeft gegeven?	Volgens mij heeft Daan de aerobics-les gegeven.	Volgens mij heeft Daan de aerobics-les gegeven.
8	Wie heeft vanochtend over de verstopping gebeld?	Wist jij dat Nienke vanochtend over de verstopping heeft gebeld?	Volgens mij heeft Eva vanochtend gebeld.	Volgens mij heeft Eva vanochtend gebeld.
9	Wie heeft het hoogste cijfer op de toets gehaald?	Wist jij dat Patrick het hoogste cijfer op de toets heeft gehaald?	Volgens mij heeft Ate het hoogste cijfer gehaald.	Volgens mij heeft Ate het hoogste cijfer gehaald.
10	Wie heeft de krant vanmiddag uit de bus gehaald?	Wist jij dat Femke vanmiddag de krant uit de bus heeft gehaald?	Volgens mij heeft Suze vanmiddag de krant gehaald.	Volgens mij heeft Suze vanmiddag de krant gehaald.
11	Wie heeft jouw balpen gepakt?	Wist jij dat Richard jouw balpen heeft gepakt?	Volgens mij heeft David de balpen gepakt.	Volgens mij heeft David de balpen gepakt.
12	Wie heeft het varken gisteren gevoerd?	Wist jij dat Michel het varken gisteren heeft gevoerd?	Volgens mij heeft Demi het varken gevoerd.	Volgens mij heeft Demi het varken gevoerd.
13	Wie heeft het pakketje naar het postkantoor gebracht?	Wist jij dat Sander het pakketje naar het postkantoor heeft gebracht?	Volgens mij heeft Owen het pakketje weggebracht.	Volgens mij heeft Owen het pakketje weggebracht.
14	Wie heeft jouw koffer van de loopband getild?	Wist jij dat Martijn jouw koffer van de loopband heeft getild?	Volgens mij heeft Hugo de koffer getild.	Volgens mij heeft Hugo de koffer getild.
15	Wie heeft vorige week de flessen weggebracht?	Wist jij dat Kim vorige week de flessen heeft weggebracht?	Volgens mij heeft Lara de flessen weggebracht.	Volgens mij heeft Lara de flessen weggebracht.
16	Wie heeft bij de buurtbingo de hoofdprijs gewonnen?	Wist jij dat Bente bij de buurtbingo de hoofdprijs heeft gewonnen?	Volgens mij heeft Noa de hoofdprijs gewonnen.	Volgens mij heeft Noa de hoofdprijs gewonnen.
17	Wie heeft de studentenverkiezingen gewonnen?	Wist jij dat Jessica de studentenverkiezingen heeft gewonnen?	Volgens mij heeft Merel de verkiezingen gewonnen.	Volgens mij heeft Merel de verkiezingen gewonnen.
18	Wie heeft als voorzitter van de studievereniging gewerkt?	Wist jij dat Nico als voorzitter van de studievereniging heeft gewerkt?	Volgens mij heeft Adam als voorzitter gewerkt.	Volgens mij heeft Adam als voorzitter gewerkt.
19	Wie heeft het internet op de school aangelegd?	Wist jij dat Marcel het internet op de school heeft aangelegd?	Volgens mij heeft Aron het internet aangelegd.	Volgens mij heeft Aron het internet aangelegd.
20	Wie heeft het hotel voor het familieweekend geboekt?	Wist jij dat Carmen het hotel voor het familieweekend heeft geboekt?	Volgens mij heeft Marit het hotel geboekt.	Volgens mij heeft Marit het hotel geboekt.
21	Wie heeft de hond van opa gisteren uitgelaten?	Wist jij dat Daphne de hond van opa gisteren heeft uitgelaten?	Volgens mij heeft Clara de hond gisteren uitgelaten.	Volgens mij heeft Clara de hond gisteren uitgelaten.
22	Wie heeft de thermostaat hoger gezet?	Wist jij dat Eddy de thermostaat hoger heeft gezet?	Volgens mij heeft Daniël de thermostaat hoger gezet.	Volgens mij heeft Daniël de thermostaat hoger gezet.
23	Wie heeft de hoofdrol in het toneelstuk gespeeld?	Wist jij dat Silke de hoofdrol in het toneelstuk heeft gespeeld?	Volgens mij heeft Noortje de hoofdrol gespeeld.	Volgens mij heeft Noortje de hoofdrol gespeeld.
24	Wie heeft de dichtwedstrijd gewonnen?	Wist jij dat Janneke de dichtwedstrijd heeft gewonnen?	Volgens mij heeft Luna de dichtwedstrijd gewonnen.	Volgens mij heeft Luna de dichtwedstrijd gewonnen.
25	Wie heeft de stageplek in Haren gekregen?	Wist jij dat Gerrit de stageplek in Haren heeft gekregen?	Volgens mij heeft Stefan de stageplek gekregen.	Volgens mij heeft Stefan de stageplek gekregen.
26	Wie heeft de stofzuiger op zijn kamer staan?	Wist jij dat Joep de stofzuiger op zijn kamer heeft staan?	Volgens mij heeft Erik de stofzuiger op zijn kamer staan.	Volgens mij heeft Erik de stofzuiger op zijn kamer staan.
27	Wie heeft de film naar de videotheek teruggebracht?	Wist jij dat Lorenzo de film naar de videotheek heeft teruggebracht?	Volgens mij heeft Robin de film teruggebracht.	Volgens mij heeft Robin de film teruggebracht.
28	Wie heeft vannacht de muziek keihard aangezet?	Wist jij dat Eldert vannacht de muziek keihard heeft aangezet?	Volgens mij heeft Joris de muziek keihard aangezet.	Volgens mij heeft Joris de muziek keihard aangezet.
29	Wie heeft de schaar uit het kastje gepakt?	Wist jij dat Marloes de schaar uit het kastje heeft gepakt?	Volgens mij heeft Romy de schaar gepakt.	Volgens mij heeft Romy de schaar gepakt.
30	Wie heeft de lamp in de gang vervangen?	Wist jij dat Carla de lamp in de gang heeft vervangen?	Volgens mij heeft Mona de lamp vervangen.	Volgens mij heeft Mona de lamp vervangen.
31	Wie heeft in de estafette als laatste gelopen?	Wist jij dat Pim in de estafette als laatste heeft gelopen?	Volgens mij heeft Luca als laatste gelopen.	Volgens mij heeft Luca als laatste gelopen.
32	Wie heeft de eerste vrije trap van de wedstrijd genomen?	Wist jij dat Christian de eerste vrije trap van de wedstrijd heeft genomen?	Volgens mij heeft Rowan de eerste vrije trap genomen.	Volgens mij heeft Rowan de eerste vrije trap genomen.
33	Wie heeft het laatste chocolaatje gepakt?	Wist jij dat Sylvia het laatste chocolaatje heeft gepakt?	Volgens mij heeft Vera het laatste chocolaatje gepakt.	Volgens mij heeft Vera het laatste chocolaatje gepakt.
34	Wie heeft de vlek in het tafelkleed gemaakt?	Wist jij dat Baukje de vlek in het tafelkleed heeft gemaakt?	Volgens mij heeft Guusje die vlek gemaakt.	Volgens mij heeft Guusje die vlek gemaakt.
35	Wie heeft de meeste stemmen bij de tv-show gekregen?	Wist jij dat Christien de meeste stemmen bij de tv-show heeft gekregen?	Volgens mij heeft Veerle de meeste stemmen gekregen.	Volgens mij heeft Veerle de meeste stemmen gekregen.
36	Wie heeft de surprise voor jouw vriend gemaakt?	Wist jij dat Andrea de surprise voor jouw vriend heeft gemaakt?	Volgens mij heeft Maartje de surprise gemaakt.	Volgens mij heeft Maartje de surprise gemaakt.
37	Wie heeft de hoogste prijs voor het schilderij geboden?	Wist jij dat Tinus de hoogste prijs voor het schilderij heeft geboden?	Volgens mij heeft Koos de hoogste prijs geboden.	Volgens mij heeft Koos de hoogste prijs geboden.
38	Wie heeft de locatie voor het etentje uitgezocht?	Wist jij dat Lieneke de locatie voor het etentje heeft uitgezocht?	Volgens mij heeft Aafke de locatie uitgezocht.	Volgens mij heeft Aafke de locatie uitgezocht.
39	Wie heeft vorige week de wc schoongemaakt?	Wist jij dat Arvid vorige week de wc heeft schoongemaakt?	Volgens mij heeft Guus de wc schoongemaakt.	Volgens mij heeft Guus de wc schoongemaakt.
40	Wie is zeilkampioen geworden?	Wist jij dat Merle zeilkampioen is geworden?	Volgens mij is Aagje zeilkampioen geworden.	Volgens mij is Aagje zeilkampioen geworden.
41	Wie heeft de baan als manager gekregen?	Wist jij dat René de baan als manager heeft gekregen?	Volgens mij heeft Doke die baan gekregen.	Volgens mij heeft Doke die baan gekregen.
42	Wie heeft de kinderen geschopt?	Wist jij dat Sylvester de kinderen heeft geschopt?	Volgens mij heeft Jacob de kinderen geschopt.	Volgens mij heeft Jacob de kinderen geschopt.
43	Wie heeft het kunstwerk in het park gemaakt?	Wist jij dat Margje het kunstwerk in het park heeft gemaakt?	Volgens mij heeft Ada het kunstwerk gemaakt.	Volgens mij heeft Ada het kunstwerk gemaakt.
44	Wie heeft de juwelen uit het museum gestolen?	Wist jij dat Harry de juwelen uit het museum heeft gestolen?	Volgens mij heeft Joost de juwelen gestolen.	Volgens mij heeft Joost de juwelen gestolen.
45	Wie heeft als zanger de schoolband ondersteund?	Wist jij dat Douwe als zanger de schoolband heeft ondersteund?	Volgens mij heeft Maarten de schoolband ondersteund.	Volgens mij heeft Maarten de schoolband ondersteund.
46	Wie heeft het misdrijf gepleegd?	Wist jij dat Danny het misdrijf heeft gepleegd?	Volgens mij heeft Yorick het misdrijf gepleegd.	Volgens mij heeft Yorick het misdrijf gepleegd.
47	Wie heeft het fotolijstje gebroken?	Wist jij dat Froukje het fotolijstje heeft gebroken?	Volgens mij heeft Beau het fotolijstje gebroken	Volgens mij heeft Beau het fotolijstje gebroken
48	Wie heeft de stoelen in de bestuurkamer verplaatst?	Wist jij dat Lindert de stoelen in de bestuurkamer heeft verplaatst?	Volgens mij heeft Jules de stoelen verplaatst.	Volgens mij heeft Jules de stoelen verplaatst.
49	Wie heeft het ongelukje tijdens het diner veroorzaakt?	Wist jij dat Jacqueline het ongelukje tijdens het diner heeft veroorzaakt?	Volgens mij heeft Erika het ongelukje veroorzaakt.	Volgens mij heeft Erika het ongelukje veroorzaakt.
50	Wie heeft het persbericht naar de tijdschriften gemaild?	Wist jij dat Mark het persbericht heeft gemaild?	Volgens mij heeft Leo het persbericht gemaild.	Volgens mij heeft Leo het persbericht gemaild.
51	Wie heeft de wijn ingeschonken?	Wist jij dat Paul de wijn heeft ingeschonken?	Volgens mij heeft Alex de wijn ingeschonken.	Volgens mij heeft Alex de wijn ingeschonken.
52	Wie heeft in de show opgetreden?	Wist jij dat Jim in de show heeft opgetreden?	Volgens mij heeft Boris in de show opgetreden.	Volgens mij heeft Boris in de show opgetreden.
53	Wie heeft haar het kaartje gestuurd?	Wist jij dat Alette haar het kaartje heeft gestuurd?	Volgens mij heeft Geke haar het kaartje gestuurd.	Volgens mij heeft Geke haar het kaartje gestuurd.
54	Wie heeft de afspraak met de arts afgezegd?	Wist jij dat Pieter de afspraak met de arts heeft afgezegd?	Volgens mij heeft Jonas de afspraak afgezegd.	Volgens mij heeft Jonas de afspraak afgezegd.
55	Wie heeft het huurcontract getekend?	Wist jij dat Gerry het huurcontract heeft getekend?	Volgens mij is Joke het contract getekend.	Volgens mij is Joke het contract getekend.
56	Wie heeft de kozijnen geplaatst?	Wist jij dat Jeroen de kozijnen heeft geplaatst?	Volgens mij heeft Abel de kozijnen geplaatst.	Volgens mij heeft Abel de kozijnen geplaatst.
57	Wie heeft er op het kind gepast?	Wist jij dat Elise op het kind heeft gepast?	Volgens mij heeft Grace op het kind gepast.	Volgens mij heeft Grace op het kind gepast.
58	Wie heeft de klok de woonkamer stiekem verzet?	Wist jij dat Casper de klok in de woonkamer stiekem heeft verzet?	Volgens mij heeft Johan de klok stiekem verzet.	Volgens mij heeft Johan de klok stiekem verzet.
59	Wie heeft over de rechter in de strafzaak geklaagd?	Wist jij dat Jeremy over de rechter in de strafzaak heeft geklaagd?	Volgens mij heeft Berend over de rechter geklaagd.	Volgens mij heeft Berend over de rechter geklaagd.
60	Wie heeft het verjaardagsdiner gekookt?	Wist jij dat Lidy het verjaardagsdiner heeft gekookt?	Volgens mij heeft Geesje het diner gekookt.	Volgens mij heeft Geesje het diner gekookt.
61	Wie heeft het monument met graffiti bespoten?	Wist jij dat Glenn het monument met graffiti heeft bespoten?	Volgens mij heeft Fabian het monument bespoten.	Volgens mij heeft Fabian het monument bespoten.
62	Wie heeft de broek in de kleedkamer laten liggen?	Wist jij dat Diny de broek in de kleedkamer heeft laten liggen?	Volgens mij heeft Kate de broek laten liggen.	Volgens mij heeft Kate de broek laten liggen.
63	Wie heeft de knuffelbeer aan de kleuter gegeven?	Wist jij dat Gerdie de knuffelbeer aan de kleuter heeft gegeven?	Volgens mij heeft Lucie de knuffelbeer aan hem gegeven.	Volgens mij heeft Lucie de knuffelbeer aan hem gegeven.
64	Wie heeft het vakantiehuisje geverfd?	Wist jij dat Quinten het vakantiehuisje heeft geverfd?	Volgens mij heeft Dave het huisje geverfd.	Volgens mij heeft Dave het huisje geverfd.
65	Wie heeft vandaag de plant water gegeven?	Wist jij dat Hilde vandaag de plant water heeft gegeven?	Volgens mij heeft Meta de plant water gegeven.	Volgens mij heeft Meta de plant water gegeven.
66	Wie heeft de zak snoep leeg gegeten?	Wist jij dat Rianne de zak snoep heeft leeg gegeten?	Volgens mij heeft Lola de snoep leeg gegeten.	Volgens mij heeft Lola de snoep leeg gegeten.
67	Wie heeft het gedicht tijdens de kerkdienst voorgedragen?	Wist jij dat Rina het gedicht tijdens de kerkdienst heeft voorgedragen?	Volgens mij heeft Dana het gedicht voorgedragen.	Volgens mij heeft Dana het gedicht voorgedragen.
68	Wie heeft de cd-speler uitgezet?	Wist jij dat Jantina de cd-speler heeft uitgezet?	Volgens mij heeft Monica de cd-speler uitgezet.	Volgens mij heeft Monica de cd-speler uitgezet.
69	Wie heeft met de docent na het praatje gediscussieerd?	Wist jij dat Piet met de docent na het praatje heeft gediscussieerd?	Volgens mij heeft Jaap met de docent gediscussieerd.	Volgens mij heeft Jaap met de docent gediscussieerd.
70	Wie heeft de heg in het stadspark gesnoeid?	Wist jij dat Siemen de heg in het stadspark heeft gesnoeid?	Volgens mij heeft Adri de heg in het stadspark gesnoeid.	Volgens mij heeft Adri de heg in het stadspark gesnoeid.
71	Wie heeft het filmpje op de bruiloft opgenomen?	Wist jij dat Bernard het filmpje op de bruiloft heeft opgenomen?	Volgens mij heeft Aad het filmpje opgenomen.	Volgens mij heeft Aad het filmpje opgenomen.
72	Wie heeft vanmiddag met de makelaar gebeld?	Wist jij dat Patricia vanmiddag met de makelaar heeft gebeld?	Volgens mij heeft Nely met de makelaar gebeld.	Volgens mij heeft Nely met de makelaar gebeld.
73	Wie heeft de kast in de slaapkamer gerepareerd?	Wist jij dat Arjan de kast in de slaapkamer heeft gerepareerd?	Volgens mij heeft Ewoud de kast gerepareerd.	Volgens mij heeft Ewoud de kast gerepareerd.
74	Wie heeft het studentencongres georganiseerd?	Wist jij dat Milos het studentencongres heeft georganiseerd?	Volgens mij heeft Aart het congres georganiseerd.	Volgens mij heeft Aart het congres georganiseerd.
75	Wie heeft gisteren de verhuisberichten verstuurd?	Wist jij dat Dirk gisteren de verhuisberichten heeft verstuurd?	Volgens mij heeft Gerard de verhuisberichten verstuurd.	Volgens mij heeft Gerard de verhuisberichten verstuurd.
76	Wie heeft de iPod bij de verloting gewonnen?	Wist jij dat Jan de iPod bij de verloting heeft gewonnen?	Volgens mij heeft Floris de iPod gewonnen.	Volgens mij heeft Floris de iPod gewonnen.
77	Wie heeft de poster van de popgroep verscheurd?	Wist jij dat Rutger de poster van de popgroep heeft verscheurd?	Volgens mij heeft Freek de poster verscheurd.	Volgens mij heeft Freek de poster verscheurd.
78	Wie heeft de reiskosten van de secretaresse betaald?	Wist jij dat Hendrik de reiskosten van de secretaresse heeft betaald?	Volgens mij heeft Juul de reiskosten betaald.	Volgens mij heeft Juul de reiskosten betaald.
79	Wie heeft er voor de geluidsoverlast gezorgd?	Wist jij dat Roy voor de geluidsoverlast heeft gezorgd?	Volgens mij heeft Karel voor de geluidsoverlast gezorgd.	Volgens mij heeft Karel voor de geluidsoverlast gezorgd.
80	Wie heeft de muziek voor de party uitgekozen?	Wist jij dat Mathijs de muziek voor de party heeft uitgekozen?	Volgens mij heeft Joop de muziek uitgekozen.	Volgens mij heeft Joop de muziek uitgekozen.
81	Wie heeft de groentewinkel overgenomen?	Wist jij dat Frits de groentewinkel heeft overgenomen?	Volgens mij heeft Robert de groentewinkel overgenomen.	Volgens mij heeft Robert de groentewinkel overgenomen.
82	Wie heeft de fiets naar het station meegenomen?	Wist jij dat Lodewijk de fiets naar het station heeft meegenomen?	Volgens mij heeft Ruud de fiets meegenomen.	Volgens mij heeft Ruud de fiets meegenomen.
83	Wie heeft op de toeristen op de luchthaven gewacht?	Wist jij dat Sanne op de toeristen op de luchthaven heeft gewacht?	Volgens mij heeft Gabi op de toeristen gewacht.	Volgens mij heeft Gabi op de toeristen gewacht.
84	Wei heeft er promotie tot chefkok gemaakt?	Wist jij dat Rens promotie tot chefkok heeft gemaakt?	Volgens mij heeft Jeen de promotie gemaakt.	Volgens mij heeft Jeen de promotie gemaakt.
85	Wie heeft de tv uit de electronicawinkel gestolen?	Wist jij dat Jasper de tv uit de electronicawinkel heeft gestolen?	Volgens mij heeft Ludo de tv uit de winkel gestolen	Volgens mij heeft Ludo de tv uit de winkel gestolen
86	Wie heeft als reservespeler de voetbalwedstrijd gespeeld?	Wist jij dat Henk als reservespeler de voetbalwedstrijd heeft gespeeld?	Volgens mij heeft Rody als reservespeler gespeeld.	Volgens mij heeft Rody als reservespeler gespeeld.
87	Wie heeft de schat van de piraat gevonden?	Wist jij dat Sjoerd de schat van de piraat heeft gevonden?	Volgens mij heeft Steven de schat gevonden.	Volgens mij heeft Steven de schat gevonden.
88	Wie heeft tijdens de modeshow een horloge gevonden?	Wist jij dat Hendrika tijdens de modeshow een horloge heeft gevonden?	Volgens mij heeft Neeltje een horloge gevonden.	Volgens mij heeft Neeltje een horloge gevonden.
89	Wie heeft de weddenschap over de paardenrace verloren?	Wist jij dat Evelien de weddenschap over de paardenrace heeft verloren?	Volgens mij heeft Petra de weddenschap verloren.	Volgens mij heeft Petra de weddenschap verloren.
90	Wie heeft het porseleinen soepbord gebroken?	Wist jij dat Dennis het porseleinen soepbord heeft gebroken?	Volgens mij heeft Roland het soepbord gebroken.	Volgens mij heeft Roland het soepbord gebroken.
91	Wie heeft voor de gasten een liedje gezongen?	Wist jij dat Anna voor de gasten een liedje heeft gezongen?	Volgens mij heeft Trudy een liedje gezongen.	Volgens mij heeft Trudy een liedje gezongen.
92	Wie heeft het dak van het ziekenhuis gerepareerd?	Wist jij dat Jan het dak van het ziekenhuis heeft gerepareerd?	Volgens mij heeft Sjaak van het dak gerepareerd.	Volgens mij heeft Sjaak van het dak gerepareerd.
93	Wie heeft als drummer voor de rockband gesolliciteerd?	Wist jij dat Justin als drummer voor de rockband heeft gesolliciteerd?	Volgens mij heeft Rudy als drummer gesolliciteerd.	Volgens mij heeft Rudy als drummer gesolliciteerd.
94	Wie heeft het standbeeld bij de veiling gekocht?	Wist jij dat Bianca het standbeeld bij de veiling heeft gekocht?	Volgens mij heeft Cora het standbeeld gekocht.	Volgens mij heeft Cora het standbeeld gekocht.
95	Wie heeft de leeuw uit het circus getemd?	Wist jij dat Kitty de leeuw uit het circus heeft getemd?	Volgens mij heeft Caren de leeuw getemd.	Volgens mij heeft Caren de leeuw getemd.
96	Wie heeft het lintje bij de openingsceremonie doorgeknipt?	Wist jij dat Suzanne het lintje bij de openingsceremonie heeft doorgeknipt?	Volgens mij heeft Eef het lintje doorgeknipt.	Volgens mij heeft Eef het lintje doorgeknipt.
97	Wie heeft de titel van sterkste man van het land gekregen?	Wist jij dat Marlon de titel van sterkste man van het land heeft gekregen?	Volgens mij heeft Joram die titel gekregen.	Volgens mij heeft Joram die titel gekregen.
98	Wie heeft de kamer van de kinderen opgeruimd?	Wist jij dat Jelmer de kamer van de kinderen heeft opgeruimd?	Volgens mij heeft Take de kamer opgeruimd.	Volgens mij heeft Take de kamer opgeruimd.
99	Wie heeft de functie van hoofdcommissaris gekregen?	Wist jij dat Rob de functie van hoofdcommissaris heeft gekregen?	Volgens mij heeft Peter die functie gekregen.	Volgens mij heeft Peter die functie gekregen.
100	Wie heeft de boodschappen voor de bejaarde gedaan?	Wist jij dat Carola de boodschappen voor de bejaarde heeft gedaan?	Volgens mij heeft Jolanda de boodschappen gedaan.	Volgens mij heeft Jolanda de boodschappen gedaan.
101	Wie heeft het brandhout voor het vuur verzameld?	Wist jij dat Bert het brandhout voor het vuur heeft verzameld?	Volgens mij heeft Geert het brandhout verzameld.	Volgens mij heeft Geert het brandhout verzameld.
102	Wie heeft de spotjes in het plafond bevestigd?	Wist jij dat Leo de spotjes in het plafond heeft bevestigd?	Volgens mij heeft Rohan de spotjes bevestigd.	Volgens mij heeft Rohan de spotjes bevestigd.
103	Wie heeft over de nieuwe liefde van de filmster geschreven?	Wist jij dat Dennis over de nieuwe liefde van de filmster heeft geschreven?	Volgens mij heeft Pablo over haar nieuwe liefde geschreven.	Volgens mij heeft Pablo over haar nieuwe liefde geschreven.
104	Wie heeft de hulpdienst gebeld?	Wist jij dat Marlies de hulpdienst heeft gebeld?	Volgens mij heeft Toos de hulpdienst gebeld.	Volgens mij heeft Toos de hulpdienst gebeld.
105	Wie heeft de liefdesbrief aan de juf geschreven?	Wist jij dat Dirk-Jan de liefdesbrief aan de juf heeft geschreven?	Volgens mij heeft Jozef de liefdesbrief geschreven.	Volgens mij heeft Jozef de liefdesbrief geschreven.
106	Wie heeft de presentatie over het nieuwe product gehouden?	Wist jij dat Claire de presentatie over het nieuwe product heeft gehouden?	Volgens mij heeft Doortje de presentatie gehouden.	Volgens mij heeft Doortje de presentatie gehouden.
107	Wie heeft de gaten in de muur geboord?	Wist jij dat Tim heeft de gaten in de muur heeft geboord?	Volgens mij heeft Ruurd de gaten in de muur geboord.	Volgens mij heeft Ruurd de gaten in de muur geboord.
108	Wie heeft het optreden van de balletgroep gefilmd?	Wist jij dat Alie het optreden van de balletgroep heeft gefilmd?	Volgens mij heeft Klaartje het optreden gefilmd.	Volgens mij heeft Klaartje het optreden gefilmd.
109	Wie heeft de crimineel opgespoord?	Wist jij dat Klaas de crimineel heeft opgespoord?	Volgens mij heeft Pedro de crimineel opgespoord.	Volgens mij heeft Pedro de crimineel opgespoord.
110	Wie heeft de bloemen uit de tuin geplukt?	Wist jij dat Sabrina de bloemen uit de tuin heeft geplukt?	Volgens mij heeft Geertje de bloemen geplukt.	Volgens mij heeft Geertje de bloemen geplukt.
111	Wie heeft de vakantie voor de kinderen betaald?	Wist jij dat Bertine de vakantie voor de kinderen heeft betaald?	Volgens mij heeft Karin de vakantie betaald.	Volgens mij heeft Karin de vakantie betaald.
112	Wie heeft de sinterklaascadeaus verstopt?	Wist jij dat Piet de sinterklaascadeaus heeft verstopt?	Volgens mij heeft Toby de sinterklaascadeaus verstopt.	Volgens mij heeft Toby de sinterklaascadeaus verstopt.
113	Wie heeft de mooiste sportwagen gekocht?	Wist jij dat Edwin de mooiste sportwagen heeft gekocht?	Volgens mij heeft Ronald de mooiste wagen gekocht.	Volgens mij heeft Ronald de mooiste wagen gekocht.
114	Wie heeft er in zijn eentje op het strand gelegen?	Wist jij dat John in zijn eentje op het strand heeft gelegen?	Volgens mij heeft Remi in zijn eentje gelegen.	Volgens mij heeft Remi in zijn eentje gelegen.
115	Wie heeft de kerstboom met slingers versierd?	Wist jij dat Monique de kerstboom met slingers heeft versierd?	Volgens mij heeft Koosje de kerstboom versierd.	Volgens mij heeft Koosje de kerstboom versierd.
116	Wie heeft van de kersenvlaai gesnoept?	Wist jij dat Mario van de kersenvlaai heeft gesnoept?	Volgens mij heeft Paco van de kersenvlaai gesnoept.	Volgens mij heeft Paco van de kersenvlaai gesnoept.
117	Wie heeft de bal door het raam geschoten?	Wist jij dat Wiebe de bal door het raam heeft geschoten?	Volgens mij heeft Toon de bal geschoten.	Volgens mij heeft Toon de bal geschoten.
118	Wie heeft de afstandsbediening als laatste gehad?	Wist jij dat Sofie de afstandsbediening als laatste heeft gehad?	Volgens mij heeft Julia hem als laatste gehad.	Volgens mij heeft Julia hem als laatste gehad.
119	Wie heeft de wijn ontkurkt?	Wist jij dat Esther de wijn heeft ontkurkt?	Volgens mij heeft Rosa de wijn ontkurkt.	Volgens mij heeft Rosa de wijn ontkurkt.
120	Wie heeft de hoogste bonus gekregen?	Wist jij dat Bert de hoogste bonus heeft gekregen?	Volgens mij heeft Janus de hoogste bonus gekregen.	Volgens mij heeft Janus de hoogste bonus gekregen.
